# Supplementary material for: Mapping of CaM, S100A1 and PIP2-Binding Epitopes in the Intracellular N- and C-Termini of TRPM4
Source: MDPI journal article supplement (doi:10.3390/ijms21124323), 2020-06-17
Supplement: s1 [file s1]

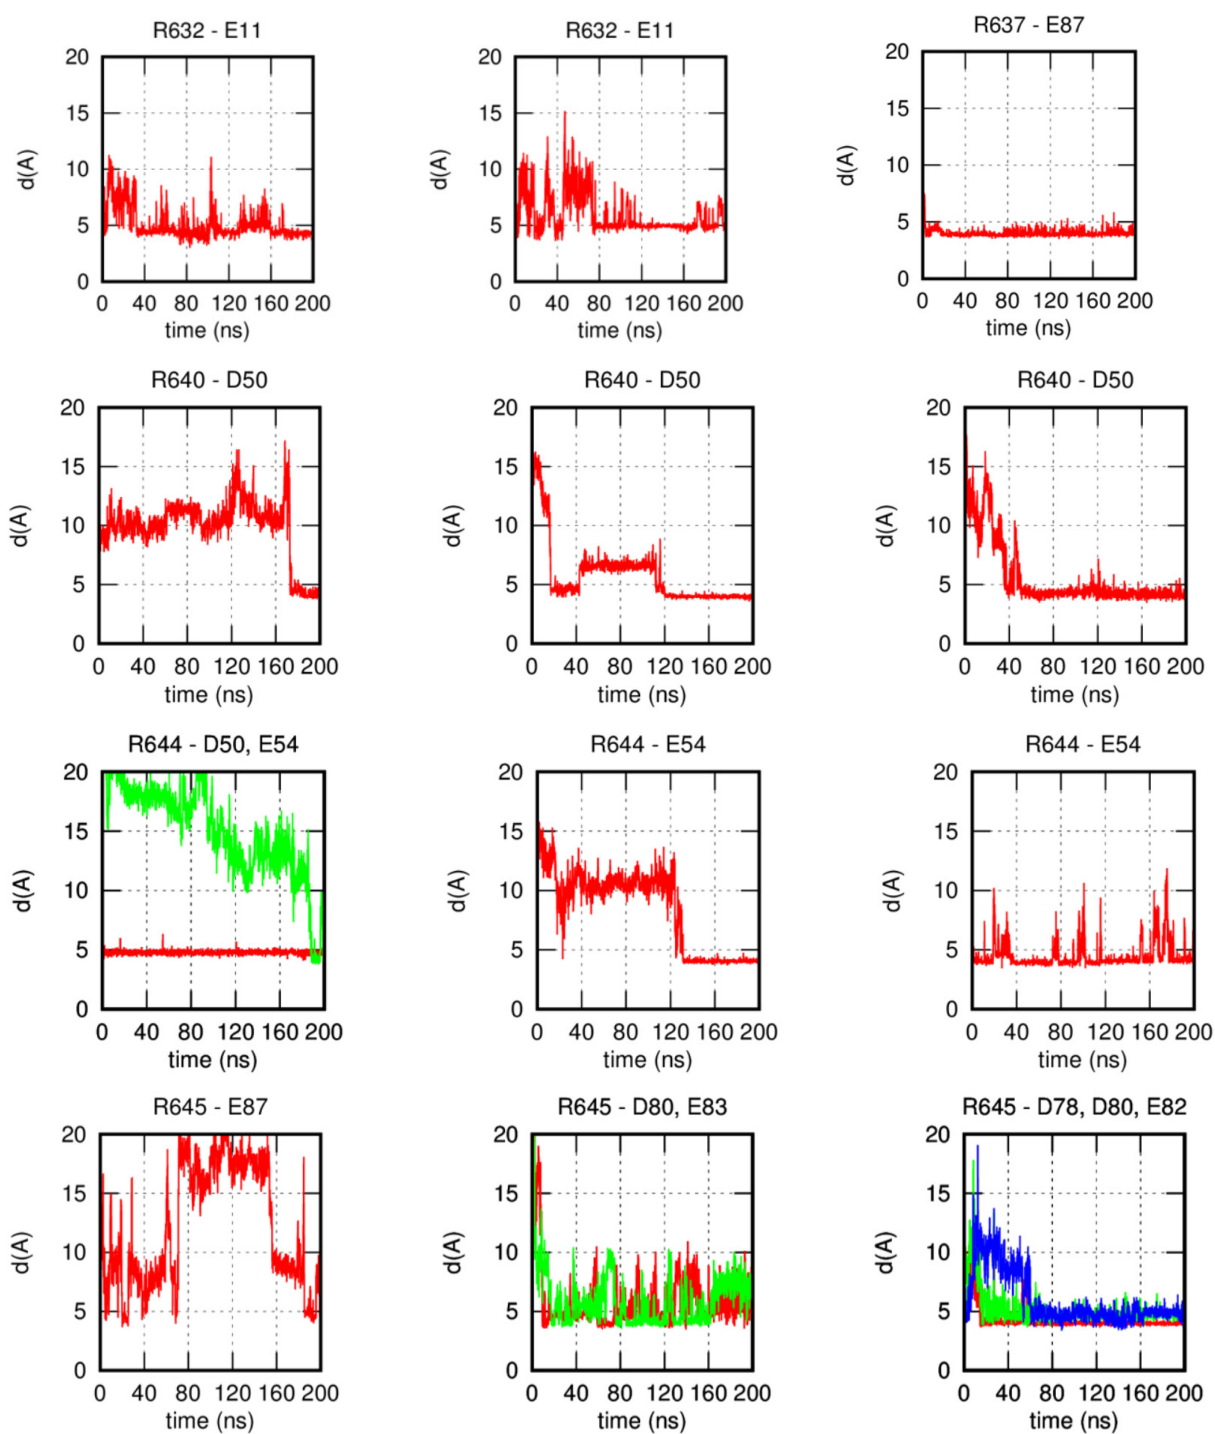

**FIGURE S1** Time evolution of salt bridges in M4nt/CaM within three independent MD runs. Distances about 5A indicate formation of salt bridges between termini of oppositely charged amino acids.

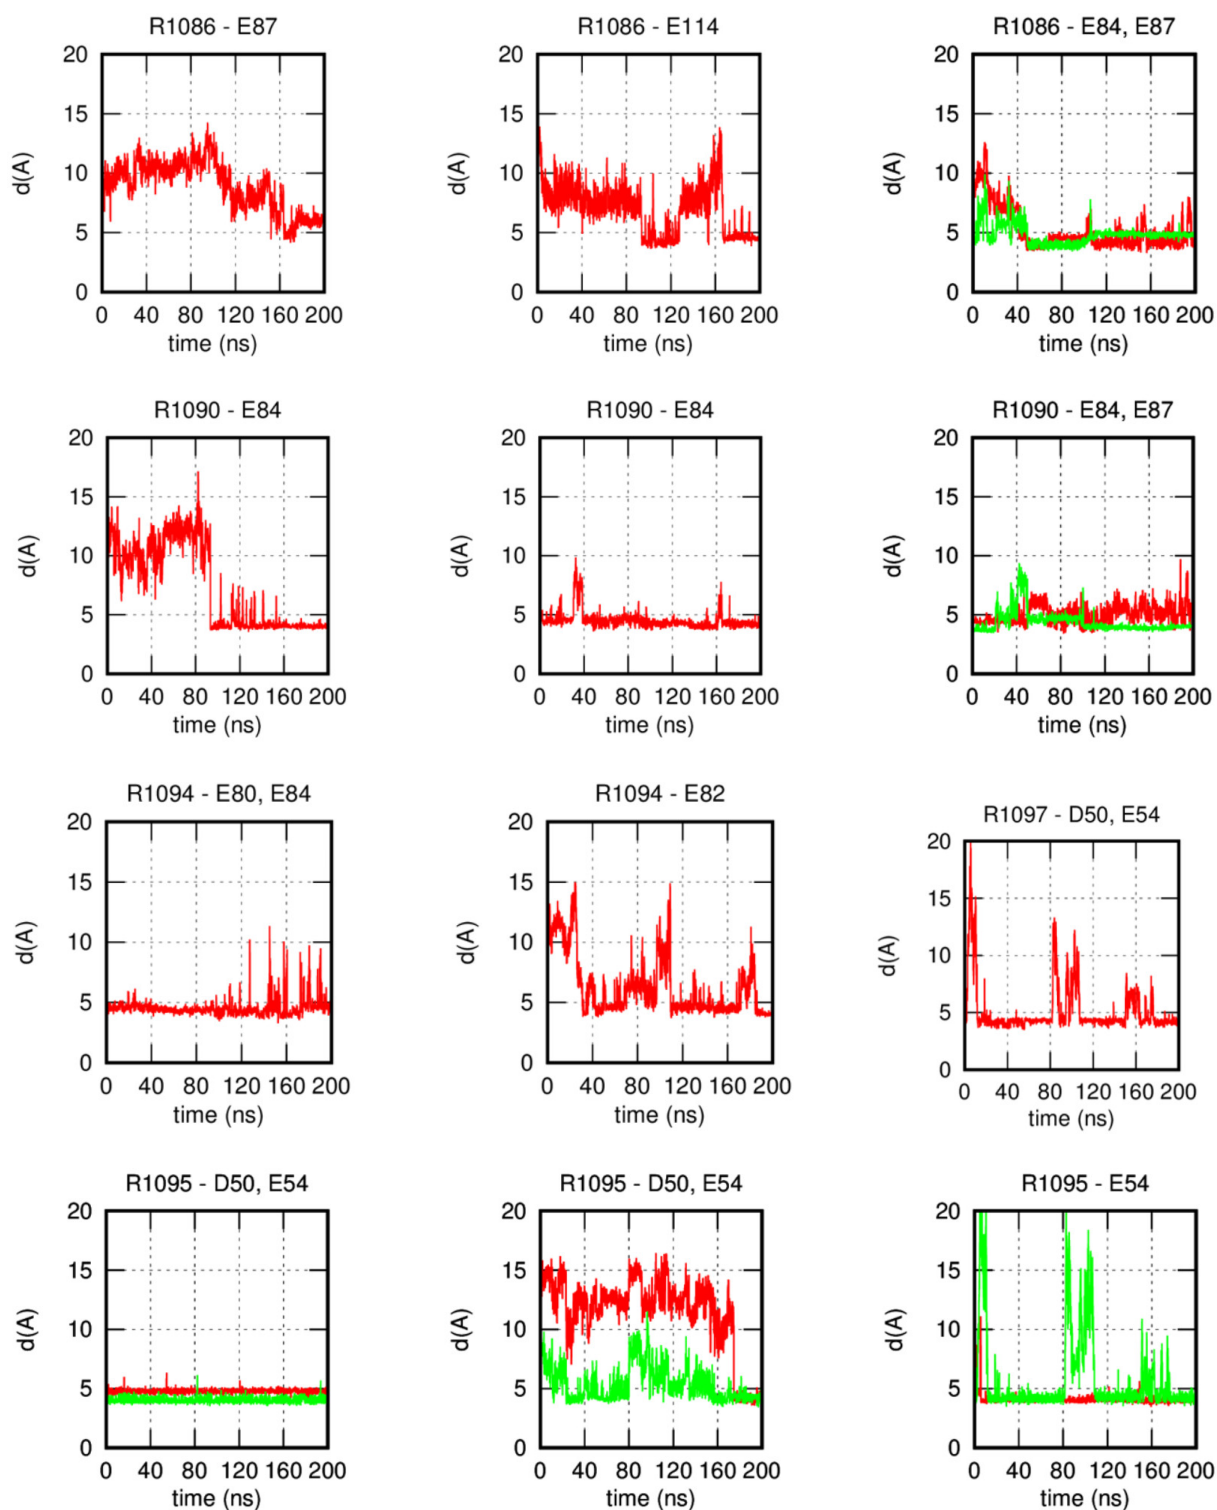

**FIGURE S2** Time evolution of salt bridges in M4ct/CaM within three independent MD runs. Distances about 5Å indicate formation of salt bridges between termini of oppositely charged amino acids.
